# Supplementary material for: A new trinuclear Cu(ii) complex of inositol as a hydrogelator
Source: Royal Society of Chemistry journal article supplement (doi:10.1039/b821283j), 2009-01-01
Supplement: b821283j.pdf [file b821283j.pdf]

## Supporting Information

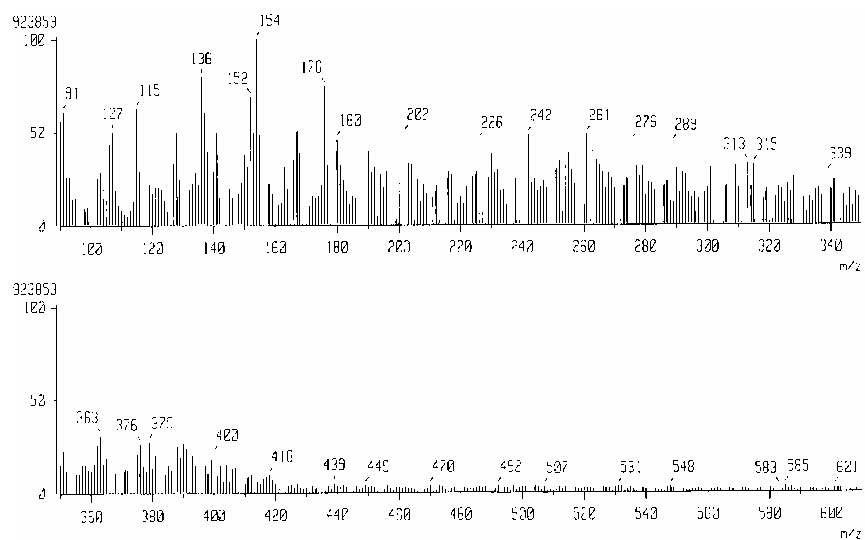

**S1.FAB-Mass of the complex  $[\text{Cu}_3\text{ins}(\text{H}_2\text{O})_6]$  in m-nitrobenzyl alcohol.**

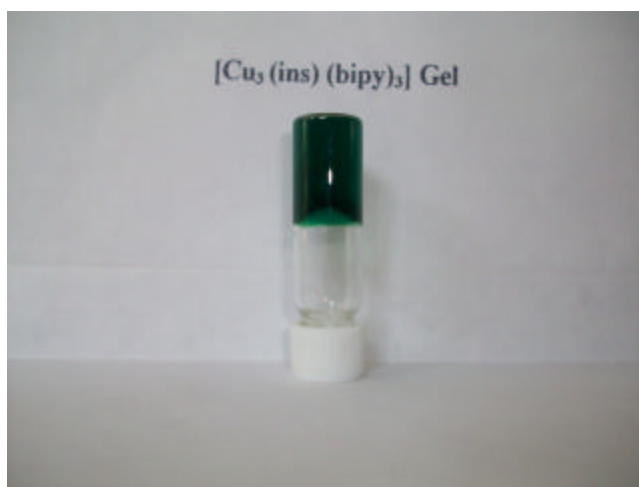

**S2. Gel in Inverted test tube.**

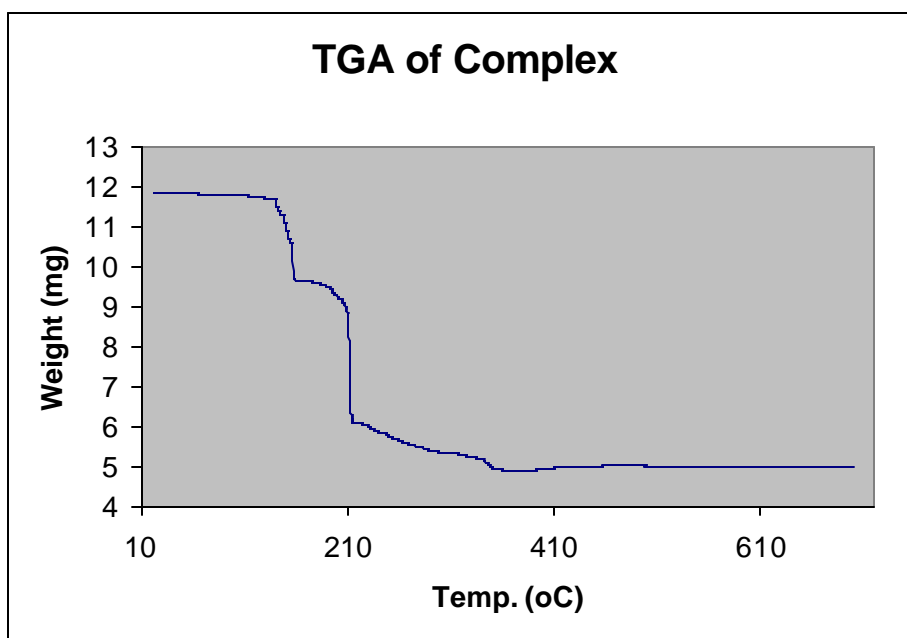

S3. TGA of the trinuclear complex  $[\text{Cu}_3\text{ins}(\text{bipy})_3]$

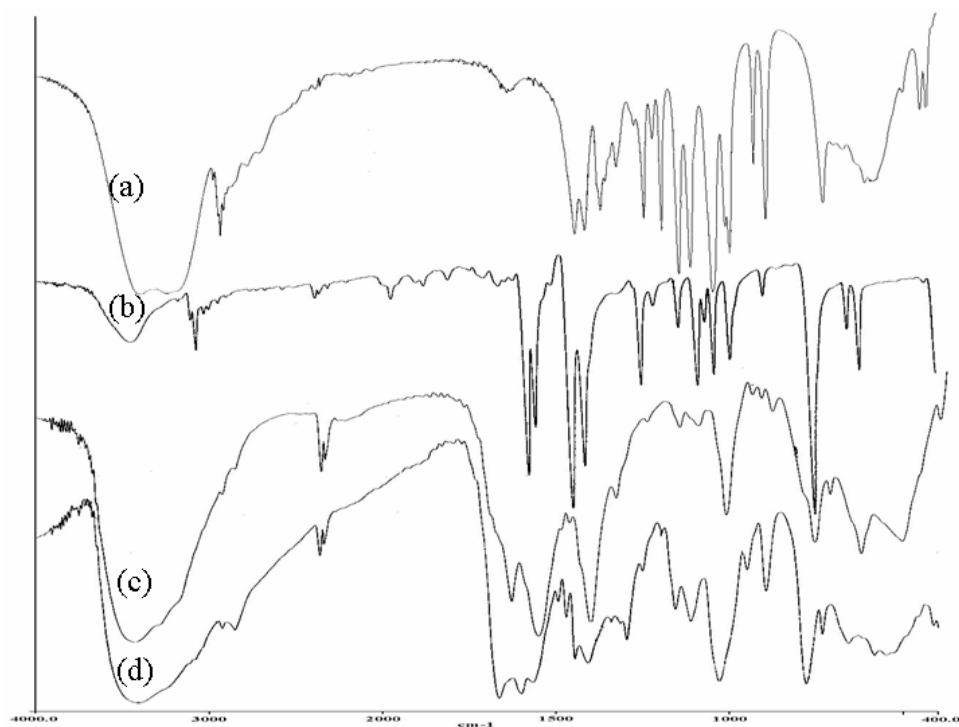

S4. FTIR spectra of inositol(a), bipyridyl(b), xerogel(c) and the trinuclear complex(d).

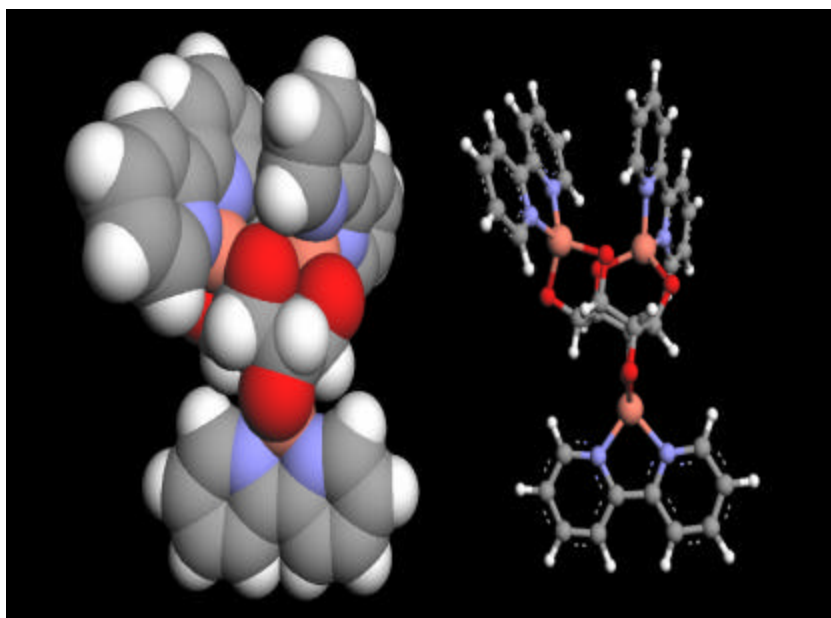

**S5.** Space filling model of the complex  $[\text{Cu}_3\text{ins}(\text{bipy})_3]$  optimized by UFF methods.  
(Shows the possibility of intramolecular p- p stacking)

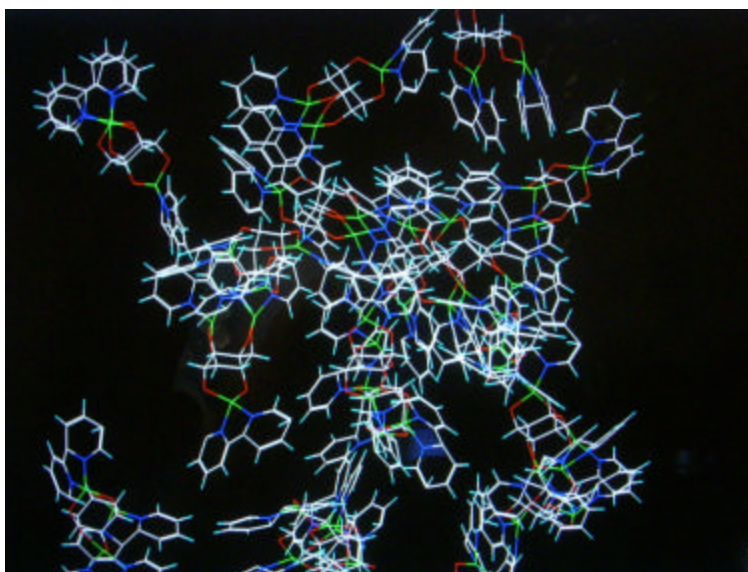

**S6.** Solvated structure of the complex  $[\text{Cu}_3(\text{ins})(\text{bipy})_3]$  with water.
